# Supplementary material for: Association between dietary factors and breast cancer risk: A matched case-control study in Ho Chi Minh City, Vietnam
Source: Research Square preprint supplement (doi:10.21203/rs.3.rs-2320957/v1), 2022-12-28
Supplement: Supplementary file 1 [file 37a75687804747a9d344a398.xlsx]

## Sheet: Sheet1
Table 1. Selected characteristics of breast cancer cases and controls, Ho Chi Minh City, Vietnam
Characteristics	Cases (n=370)	Controls (n=370)	P value
Age (Mean ± SD)	51.7 ± 10.8	51.7 ± 10.9	0.93
Education level (n, %)
Secondary school and lower	273 (73.8%)	190 (51.4%)	<0.01
High school and higher	97 (26.2%)	180 (48.6%)
BMI (kg/m2)
<18.5	27 (7.3%)	15 (4.1%)	<0.01
18.5-23	183 (49.5%)	143 (38.6%)
23-27.5	127 (34.3%)	161 (43.5%)
>27.5	33 (8.9%)	51 (13.8%)
Age at menarche (Mean ± SD)	15.3 ± 1.81	14.6 ± 1.93	<0.01
Age at first birth (Mean ± SD)	24.6 ± 4.83	26.0 ± 5.07	<0.01
Parity (n, %)
Nulliparious	46 (12.4%)	76 (20.5%)	<0.01
1	48 (13.0%)	63 (17.0%)
2	161 (43.5%)	145 (39.2%)
≥3	115 (31.1%)	86 (23.2%)
Menopausal status (Yes, %)	196 (53.0%)	187 (50.5%)	0.56
History of benign breast disease	20 (5.4%)	9 (2.4%)	0.06
Oral contraceptive use, ever	18 (4.9%)	13 (3.5%)	0.46
Physical activity: ≥3 times/week	203 (54.9%)	157 (42.4%)	<0.01
Family history of breast cancer (Yes, %)	17 (4.6%)	18 (4.9%)	1
BMI: boday mass index, SD: standard deviation
