# Supplementary material for: Association between dietary factors and breast cancer risk: A matched case-control study in Ho Chi Minh City, Vietnam
Source: Research Square preprint supplement (doi:10.21203/rs.3.rs-2320957/v1), 2022-12-28
Supplement: Supplementary file 2 [file 5cf0f59d7ceec6343a403fcc.xlsx]

## Sheet: Sheet1
Table 2. The participant distribution and crude odds ratios for the association of breast cancer across the quartiles of food group intakes
Food intakes	Cases	Controls	Crude OR	P value
	(n =370)	(n =370)	(95% CI)
Dark green vegetables
Quartile 1: <3.75 servings/week	103 (27.84)	66 (17.84)	1
Quartile 2: 3.75 - <6.02 servings/week	94 (25.41)	80 (21.62)	0.75 (0.49-1.16)	0.19
Quartile 3: 6.02 - <9.69 servings/week	84 (22.70)	102 (27.57)	0.53 (0.35-0.81)	<0.01
Quartile 4: ≥9.69 servings/week	89 (24.05)	122 (32.97)	0.47 (0.31-0.71)	<0.01
Red/Orange vegetables
Quartile 1: <1.75 servings/week	82 (22.16)	95 (25.68)	1
Quartile 2: 1.75 - <3.09 servings/week	112 (30.27)	74 (20.00)	1.75 (1.16-2.66)	<0.01
Quartile 3: 3.09 - <5.33 servings/week	108 (29.19)	110 (29.73)	1.14 (0.76-1.69)	0.52
Quartile 4: ≥5.33 servings/week	68 (18.38)	91 (24.59)	0.87 (0.56-1.33)	0.51
Legumes
Quartile 1: <0.06 servings/week	106 (28.65)	61 (16.49)	1
Quartile 2: 0.06 - <0.32 servings/week	140 (37.84)	123 (33.24)	0.65 (0.44-0.97)	0.04
Quartile 3: 0.32 - <1.21 servings/week	109 (29.46)	144 (38.92)	0.44 (0.29-0.65)	<0.01
Quartile 4: ≥1.21 servings/week	15 (4.05)	42 (11.35)	0.21 (0.11-0.40)	<0.01
Starchy vegetables
Quartile 1: <0.75 servings/week	160 (43.24)	85 (22.97)	1
Quartile 2: 0.75 - <1.96 servings/week	78 (21.08)	112 (30.27)	0.37 (0.25-0.55)	<0.01
Quartile 3: 1.96 - <3.62 servings/week	82 (22.16)	111 (30.00)	0.39 (0.27-0.58)	<0.01
Quartile 4: ≥3.62 servings/week	50 (13.51)	62 (16.76)	0.43 (0.27-0.68)	<0.01
Other vegetables
Quartile 1: <3.33 servings/week	107 (28.92)	67 (18.11)	1
Quartile 2: 3.33 - <5.38 servings/week	90 (24.32)	91 (24.59)	0.62 (0.41-0.94)	0.03
Quartile 3: 5.38 - <8.23 servings/week	92 (24.86)	95 (25.68)	0.61 (0.40-0.92)	0.02
Quartile 4: ≥8.23 servings/week	81 (21.89)	117 (31.62)	0.43 (0.29-0.66)	<0.01
Fruits
Quartile 1: <4.84 servings/week	113 (30.54)	77 (20.81)	1
Quartile 2: 4.84 - <8.88 servings/week	100 (27.03)	84 (22.70)	0.81 (0.54-1.22)	0.32
Quartile 3: 8.88 - <15.28 servings/week	95 (25.68)	88 (23.78)	0.74 (0.49-1.11)	0.14
Quartile 4: ≥15.28 servings/week	62 (16.76)	121 (32.70)	0.35 (0.23-0.53)	<0.01
Red meat
Quartile 1: <4.66 servings/week	109 (29.46)	94 (25.41)	1
Quartile 2: 4.66 - <8.65 servings/week	71 (19.19)	93 (25.14)	0.66 (0.43-0.99)	0.04
Quartile 3: 8.65 - <15.83 servings/week	106 (28.65)	98 (26.49)	0.93 (0.63-1.38)	0.73
Quartile 4: ≥15.83 servings/week	84 (22.70)	85 (22.97)	0.85 (0.57-1.28)	0.44
White meat
Quartile 1: <0.89 servings/week	111 (30.00)	108 (29.19)	1
Quartile 2: 0.89 - <2.21 servings/week	92 (24.86)	133 (35.95)	0.67 (0.46-0.98)	0.04
Quartile 3: 2.21 - <5.42 servings/week	100 (27.03)	83 (22.43)	1.17 (0.79-1.74)	0.43
Quartile 4: ≥5.42 servings/week	67 (18.11)	46 (12.43)	1.42 (0.89-2.24)	0.14
Innard
Quartile 1: <5.75 servings/week	214 (57.84)	248 (67.03)	1
Quartile 2: 5.75 - <23.01 servings/week	49 (13.24)	40 (10.81)	1.42 (0.90-2.24)	0.13
Quartile 3: 23.01 - <57.54 servings/week	59 (15.95)	43 (11.62)	1.59 (1.03-2.45)	0.04
Quartile 4: ≥57.54 servings/week	48 (12.97)	39 (10.54)	1.43 (0.90-2.26)	0.13
Seafood
Quartile 1: <3.74 servings/week	94 (25.41)	104 (28.11)	1
Quartile 2: 3.74 - <6.01 servings/week	96 (25.95)	83 (22.43)	1.28 (0.85-1.92)	0.23
Quartile 3: 6.01 - <9.65 servings/week	91 (24.59)	98 (26.49)	1.03 (0.69-1.53)	0.89
Quartile 4: ≥9.65 servings/week	89 (24.05)	85 (22.97)	1.16 (0.77-1.74)	0.48
Egg
Quartile 1: <1.01 servings/week	139 (37.57)	79 (21.35)	1
Quartile 2: 1.01 - <2.62 servings/week	102 (27.57)	116 (31.35)	0.50 (0.34-0.73)	<0.01
Quartile 3: 2.62 - <4.62 servings/week	84 (22.70)	102 (27.57)	0.47 (0.31-0.70)	<0.01
Quartile 4: ≥4.62 servings/week	45 (12.16)	71 (19.19)	0.36 (0.23-0.57)	<0.01
Soybean product
Quartile 1: <0.46 servings/week	119 (32.16)	62 (16.76)	1
Quartile 2: 0.46 - <1.55 servings/week	155 (41.89)	151 (40.81)	0.53 (0.37-0.78)	<0.01
Quartile 3: 1.55 - <3.68 servings/week	58 (15.68)	99 (26.76)	0.31 (0.20-0.48)	<0.01
Quartile 4: ≥3.68 servings/week	38 (10.27)	58 (15.68)	0.34 (0.20-0.57)	<0.01
Tea
Quartile 1: <0.17 servings / day	244 (65.95)	195 (52.70)	1
Quartile 2: 0.17 - <0.57 servings / day	24 (6.49)	38 (10.27)	0.50 (0.29-0.87)	0.01
Quartile 3: 0.57 - <3 servings / day	61 (16.49)	90 (24.32)	0.54 (0.37-0.79)	<0.01
Quartile 4: ≥3 servings / day	41 (11.08)	47 (12.70)	0.70 (0.44-1.10)	0.12
Dairy beverages
Quartile 1: <2.82 servings/week	224 (60.54)	161 (43.51)	1
Quartile 2: 2.82 - <8.89 servings/week	54 (14.59)	91 (24.59)	0.43 (0.29-0.63)	<0.01
Quartile 3: 8.89 - <22.09 servings/week	52 (14.05)	77 (20.81)	0.49 (0.32-0.73)	<0.01
Quartile 4: ≥22.09 servings/week	40 (10.81)	41 (11.08)	0.70 (0.43-1.13)	0.15
Soft drink
Quartile 1: <0.12 servings/week	253 (68.38)	244 (65.95)	1
Quartile 2: 0.12 - <0.58 servings/week	72 (19.46)	75 (20.27)	0.93 (0.64-1.34)	0.68
Quartile 3: 0.58 - <2.12 servings/week	27 (7.30)	33 (8.92)	0.79 (0.46-1.35)	0.39
Quartile 4: ≥2.12 servings/week	18 (4.86)	18 (4.86)	0.96 (0.49-1.90)	0.92
Fruit juice
Quartile 1: <1.03 servings/week	150 (40.54)	120 (32.43)	1
Quartile 2: 1.03 - <2.53 servings/week	90 (24.32)	95 (25.68)	0.76 (0.52-1.10)	0.15
Quartile 3: 2.53 - <5.53 servings/week	79 (21.35)	78 (21.08)	0.81 (0.55-1.20)	0.29
Quartile 4: ≥5.53 servings/week	51 (13.78)	77 (20.81)	0.53 (0.35-0.81)	<0.01
Coffee
Quartile 1: <0.24 servings/week	210 (56.76)	181 (48.92)	1
Quartile 2: 0.24 - <1.38 servings/week	33 (8.92)	29 (7.84)	0.98 (0.57-1.68)	0.94
Quartile 3: 1.38 - <7.24 servings/week	101 (27.30)	126 (34.05)	0.69 (0.50-0.96)	0.03
Quartile 4: ≥7.24 servings/week	25 (6.76)	34 (9.19)	0.63 (0.36-1.10)	0.11
CI: confidence interval, OR: odds ratio
